# Supplementary material
Source: Springer Nature journal article supplement (https://www.springermedizin.de/resource/supplementary/12962_2008_111_MOESM3_ESM.pdf/9572222)

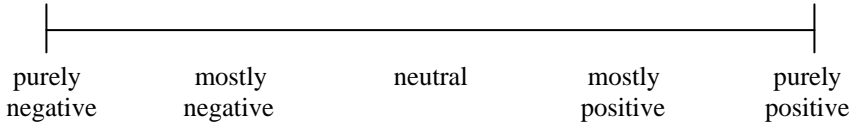

Supplement: MOESM3 [file 9572222]
